# Supplementary material
Source: publisher site journal article supplement (https://www.spandidos-publications.com/8448/downloadSupplementary)
Supplement: Supplementary file 1 [file downloadSupplementary]

## Sheet: Sheet1
Table SIII. Inhibitory effects of Saikosaponin A on the proliferation of Huh7 cells assessed by Cell Counting Kit-8 assay.
Saikosaponin A (μM)	24 h				48 h				72 h
0	0.870432	1.03743	1.04585	1.04629	0.912809	0.987681	1.00371	1.0958	0.960535	0.993495	1.00264	1.04333
5	1.05781	1.08837	0.932669	1.1402	0.862576	0.911613	0.931946	0.949886	0.843045	0.895245	0.918112	0.977724
10	0.908527	0.918715	0.951495	0.975858	0.848224	0.859227	0.887932	0.89463	0.862285	0.903446	0.96432	0.973151
15	0.978959	0.859136	1.06489	1.08527	0.953474	0.881222	0.836	1.11015	0.83863	0.952334	1.06399	1.07818
20	0.797785	0.809302	0.858915	0.90144	0.714029	0.731491	0.802057	0.840091	0.826171	0.893353	0.952019	0.969997
30	0.0013289	0.0287929	0.0420819	0.0442968	0.0114819	0.0119603	0.0203325	0.0303791	0.00540136	0.00429743	0.0031935	3.9426e-05
40	0.014175	0.0380952	0.0389812	0.0403101	0.0186581	0.0193757	0.0220069	0.0277479	0.000591389	0.00421858	0.00453399	0.00863428
